# Supplementary material
Source: PubMed Central journal article supplement (PMC6325473)
Supplement: ajcr0008-2575-f8.pdf [file ajcr0008-2575-f8.pdf]

## Exposure to incense burning smoke sensitizes NSCLC to EGFR TKIs

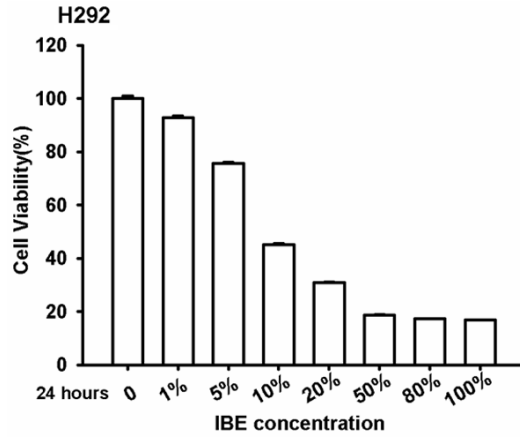

**Supplementary Figure 1.** Cell viability of H292 cells in response to short-term IBE treatment. H292 cells were treated with different concentration of IBE as indicated for 24 hours, and then the cell viabilities were determined by MTT assay.

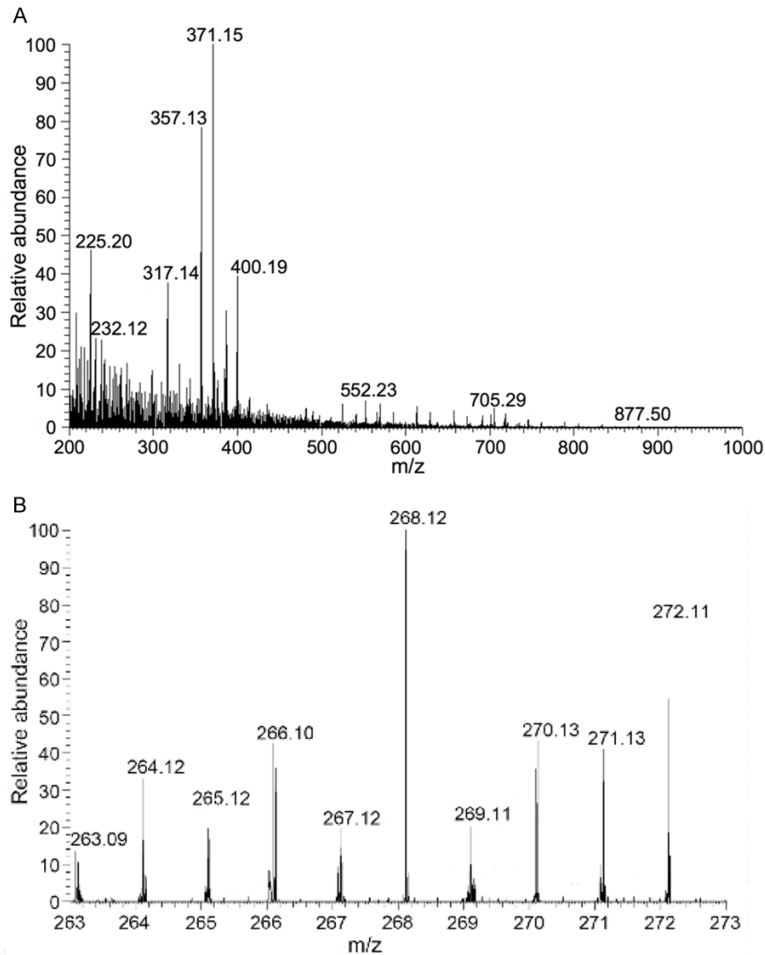

**Supplementary Figure 2.** Mass spectrometry analysis of incense burning smoke solution. Incense-burning smoke was dissolved into de-ionized water by suction with pump. The relative abundance of IBE compositions was performed in the Orbitrap LC-MS with a mass resolution of 60,000 at  $m/z$  200 (A). The survey scan of IBE compositions at 268.12 was similar with commercial standard Auramine O [38] (B).

Exposure to incense burning smoke sensitizes NSCLC to EGFR TKIs

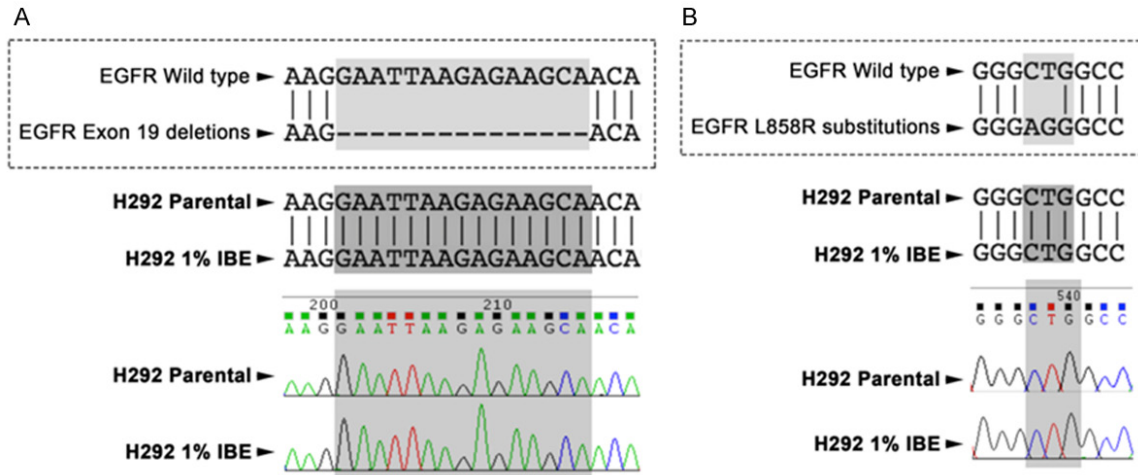

**Supplementary Figure 3.** Activating mutations of EGFR were not detected in IBE stable clone of H292 cells. EGFR sequence at Exon 19 deletion (A) and L858R point mutation (B) in 1% IBE-treated clone of H292 cells was aligned and compared with that in the parental cells.

# Exposure to incense burning smoke sensitizes NSCLC to EGFR TKIs

## Supplementary Materials and Methods

### *Mass spectrometry analysis*

Incense-burning smoke was continuously dissolved into water by suction with pump. The survey scan of IBE compositions was performed in the Orbitrap LC-MS (ThermoFisher scientific) with a mass resolution of 60,000 at  $m/z$  200. The flow rate of HPLC was 50  $\mu\text{L}/\text{min}$ , and solution gradient was from 0% to 100% B (B = 80% acetonitrile, 0.1% formic acid) over 30 min minutes.

Total proteins (40  $\mu\text{g}$ ) lysate of parental, IBE-treated, or auramine-treated H292 cells were separated by 10% SDS-PAGE and divided into eight gel fractions. After in-gel trypsin digestion, the tryptic peptides of each fraction were injected into the linear ion trap-Fourier transform ion cyclotron resonance mass spectrometer (LTQ-FTICR MS) (Thermo Electron) for mass identification. The survey scan ( $m/z$  range: 320-2,000) was performed in FTICR MS with a mass resolution of 100,000 at  $m/z$  400. The top ten most abundant multiply charged ions were sequentially isolated for MS/MS assay by LTQ. Protein identification and label-free quantitative analysis were performed by MaxQuant and MaxLFQ softwares, respectively. The significance threshold for the identification was set as  $P < 0.01$ .

# Exposure to incense burning smoke sensitizes NSCLC to EGFR TKIs

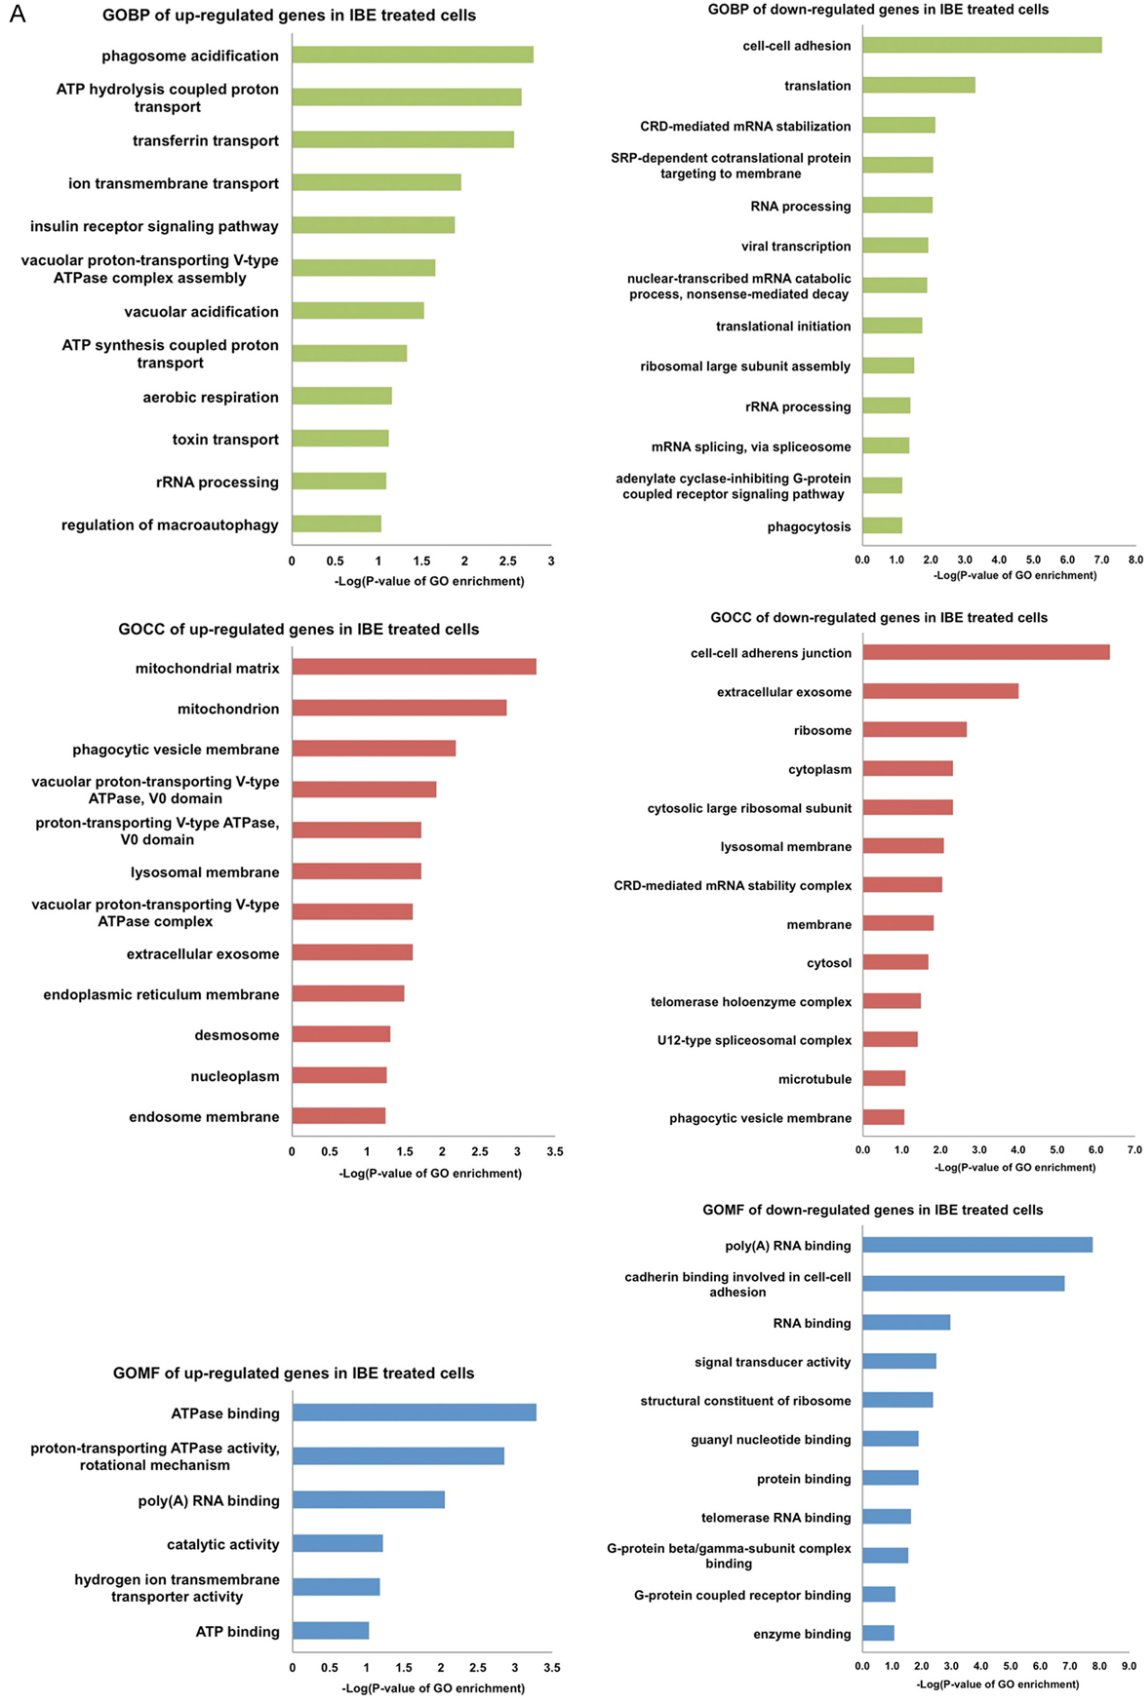

# Exposure to incense burning smoke sensitizes NSCLC to EGFR TKIs

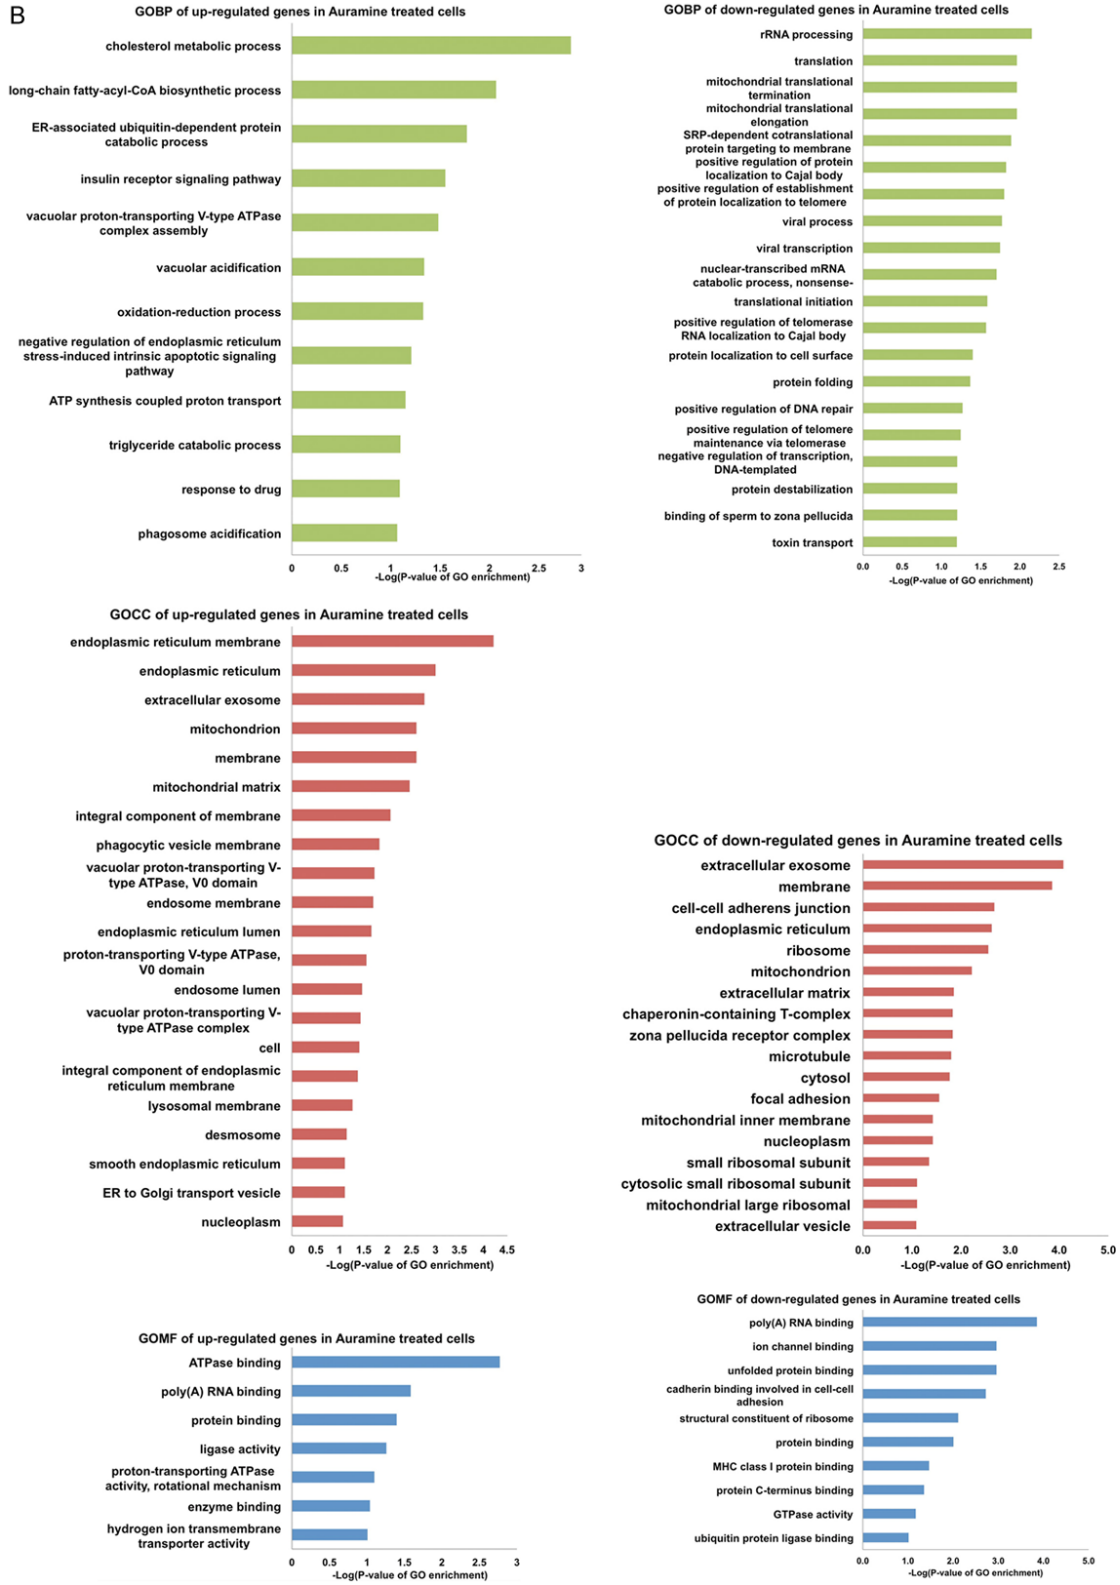

**Supplementary Figure 4.** Enrichment of Gene Ontology (GO) terms in up- or down-regulated genes in H292 IBE/Auramine cells vs. parental cells. GO terms belong to cellular components (GOCC), biological processes (GOBP) and molecular functions (GOMF) of H292 IBE- (A) or auramine- (B) treated cells were shown in red, green, and blue, respectively. GO terms were analyzed by David functional annotation tools (<https://david.ncicrf.gov/tools.jsp>).
